**Corrections**

*Transcriptional regulation of macrophage cholesterol trafficking by PPAR $\alpha$  and LXR*

By G. CHINETTI, J.C. FRUCHART and B. STAELS

Volume 34 Part 6 (2006) 1128–1131

Owing to a technical problem at the printing stage, Figure 1 as featured on page 1130 was misprinted. The printed version of this Figure should have appeared as shown below (together with the associated Figure legend). The online version of the Figure was not affected.

**Figure 1 | Role of PPAR $\alpha$  and LXRs in macrophage cholesterol trafficking**

PPAR $\alpha$  and LXR activation stimulates the post-lysosomal mobilization of cholesterol by regulating NPC1 and NPC2 expression. This leads to an enrichment of cholesterol in the plasma membrane and a redistribution of cholesterol in the outer cell-surface domains, where it is more available for efflux through the ABCA1 pathway. As a consequence, PPAR $\alpha$  and LXR activation decreases the availability of cholesterol for ACAT1 and thus the cellular amount of CEs.

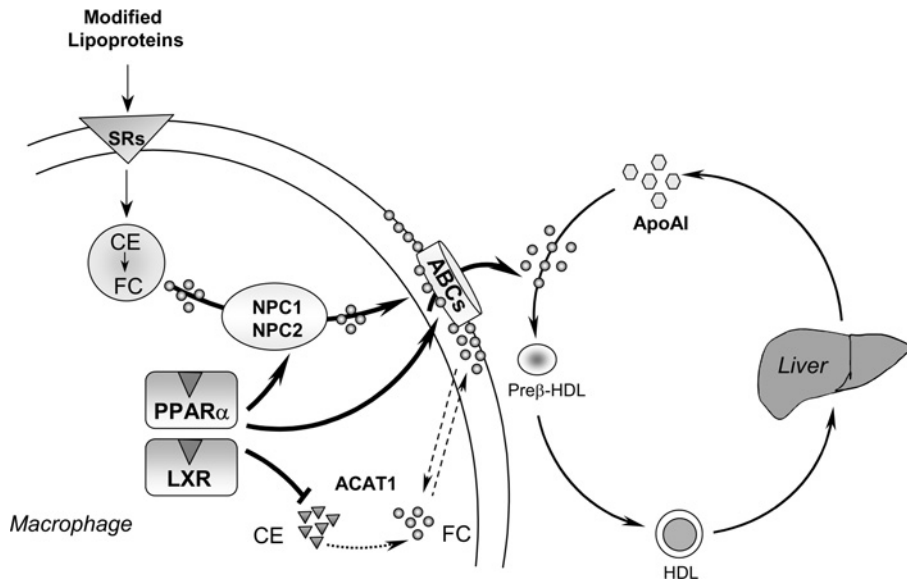

Corrections continue on the next page
